# Supplementary material for: Characterization of the Complete Mitochondrial Genome Sequences of Three Croakers (Perciformes, Sciaenidae) and Novel Insights into the Phylogenetics
Source: PubMed Central journal article supplement (PMC6032254; doi:10.3390/ijms19061741), 2018-06-12
Supplement: ijms-19-01741-s001.pdf [file ijms-19-01741-s001.pdf]

Table S1. Codon Number, Frequency and RSCU (Relative Synonymous Codon Usage) of mitochondrial genomes for *Protonibea diacanthus*.

| Amino acid | Codon | Number | Frequency(%) | RSCU   |
|------------|-------|--------|--------------|--------|
| Ala        | GCC   | 170    | 4.4702       | 1.9048 |
| Ala        | GCA   | 115    | 3.0239       | 1.2885 |
| Ala        | GCT   | 58     | 1.5251       | 0.6499 |
| Ala        | GCG   | 14     | 0.3681       | 0.1569 |
| Arg        | CGA   | 46     | 1.2096       | 2.3000 |
| Arg        | CGC   | 22     | 0.5785       | 1.1000 |
| Arg        | CGG   | 6      | 0.1578       | 0.3000 |
| Arg        | CGT   | 6      | 0.1578       | 0.3000 |
| Asn        | AAC   | 88     | 2.3140       | 1.4915 |
| Asn        | AAT   | 30     | 0.7889       | 0.5085 |
| Asp        | GAC   | 62     | 1.6303       | 1.6104 |
| Asp        | GAT   | 15     | 0.3944       | 0.3896 |
| Cys        | TGC   | 20     | 0.5259       | 1.5385 |
| Cys        | TGT   | 6      | 0.1578       | 0.4615 |
| Gln        | CAA   | 79     | 2.0773       | 1.7363 |
| Gln        | CAG   | 12     | 0.3155       | 0.2637 |
| Glu        | GAA   | 73     | 1.9195       | 1.4314 |
| Glu        | GAG   | 29     | 0.7626       | 0.5686 |
| Gly        | GGC   | 106    | 2.7873       | 1.7890 |
| Gly        | GGA   | 62     | 1.6303       | 1.0464 |
| Gly        | GGG   | 37     | 0.9729       | 0.6245 |
| Gly        | GGT   | 32     | 0.8414       | 0.5401 |
| His        | CAC   | 77     | 2.0247       | 1.4528 |
| His        | CAT   | 29     | 0.7626       | 0.5472 |
| Ile        | ATC   | 147    | 3.8654       | 1.0352 |
| Ile        | ATT   | 137    | 3.6024       | 0.9648 |
| Leu        | CTC   | 215    | 5.6534       | 1.9225 |
| Leu        | CTA   | 180    | 4.7331       | 1.6095 |
| Leu        | CTT   | 134    | 3.5235       | 1.1982 |
| Leu        | TTA   | 74     | 1.9458       | 0.6617 |
| Leu        | CTG   | 48     | 1.2622       | 0.4292 |
| Leu        | TTG   | 20     | 0.5259       | 0.1788 |
| Lys        | AAA   | 69     | 1.8144       | 1.7692 |
| Lys        | AAG   | 9      | 0.2367       | 0.2308 |
| Met        | ATA   | 88     | 2.3140       | 1.2754 |
| Met        | ATG   | 50     | 1.3148       | 0.7246 |
| Phe        | TTC   | 151    | 3.9705       | 1.2227 |
| Phe        | TTT   | 96     | 2.5243       | 0.7773 |

|     |     |     |        |        |
|-----|-----|-----|--------|--------|
| Pro | CCC | 123 | 3.2343 | 2.1674 |
| Pro | CCA | 51  | 1.3410 | 0.8987 |
| Pro | CCT | 41  | 1.0781 | 0.7225 |
| Pro | CCG | 12  | 0.3155 | 0.2115 |
| Ser | TCC | 79  | 2.0773 | 2.1161 |
| Ser | TCA | 61  | 1.6040 | 1.6339 |
| Ser | AGC | 34  | 0.8940 | 0.9107 |
| Ser | TCT | 28  | 0.7363 | 0.7500 |
| Ser | AGT | 14  | 0.3681 | 0.3750 |
| Ser | TCG | 8   | 0.2104 | 0.2143 |
| Stp | TAA | 4   | 0.1052 | 2.0000 |
| Stp | AGA | 2   | 0.0526 | 1.0000 |
| Stp | TAG | 2   | 0.0526 | 1.0000 |
| Stp | AGG | 0   | 0.0000 | 0.0000 |
| Thr | ACC | 136 | 3.5761 | 1.8133 |
| Thr | ACA | 103 | 2.7084 | 1.3733 |
| Thr | ACT | 51  | 1.3410 | 0.6800 |
| Thr | ACG | 10  | 0.2630 | 0.1333 |
| Trp | TGA | 93  | 2.4454 | 1.5630 |
| Trp | TGG | 26  | 0.6837 | 0.4370 |
| Tyr | TAC | 81  | 2.1299 | 1.3729 |
| Tyr | TAT | 37  | 0.9729 | 0.6271 |
| Val | GTA | 61  | 1.6040 | 1.2513 |
| Val | GTC | 60  | 1.5777 | 1.2308 |
| Val | GTT | 50  | 1.3148 | 1.0256 |
| Val | GTG | 24  | 0.6311 | 0.4923 |

Tab. S2 Pairwise evolutionary rates of the *Argyrosomus amoyensis* (AA), *Nibeacorbis* (NC), and *Protonibeacorbis* (PD) mitochondrial genomes

|       | ATP6   | ATP8   | COX1   | COX2   | COX3   | CYTB   | ND1    | ND2    | ND3    | ND4    | ND4L   | ND5    | ND6    |
|-------|--------|--------|--------|--------|--------|--------|--------|--------|--------|--------|--------|--------|--------|
| NC-AA | 0.0353 | 0.1209 | 0.0175 | 0.0265 | 0.0138 | 0.0190 | 0.0375 | 0.0965 | 0.0725 | 0.0578 | 0.0802 | 0.1926 | 0.1162 |
| NC-PD | 0.0223 | 0.1366 | 0.0143 | 0.0414 | 0.0226 | 0.0272 | 0.0426 | 0.0834 | 0.0728 | 0.0654 | 0.0448 | 0.2714 | 0.1328 |
| AA-PD | 0.0417 | 0.0244 | 0.0100 | 0.0305 | 0.0104 | 0.0288 | 0.0297 | 0.0811 | 0.0692 | 0.0379 | 0.0258 | 0.2472 | 0.1162 |

Table S3. 204 species and their taxonomy of Series Eupercaria for the phylogenetic tree

| No. | ID        | Species                              | Order            | Family            | Genus                 |                  |
|-----|-----------|--------------------------------------|------------------|-------------------|-----------------------|------------------|
| 1   | NC_009830 | <i>Acanthurus leucosternon</i>       | Acanthuriformes  | Acanthuridae      | <i>Acanthurus</i>     |                  |
| 2   | NC_009853 | <i>Naso lopezi</i>                   |                  |                   | <i>Naso</i>           |                  |
| 3   | NC_029237 | <i>Paracanthurus hepatus</i>         |                  |                   | <i>Paracanthurus</i>  |                  |
| 4   | NC_009874 | <i>Zebrasoma flavescens</i>          |                  |                   | <i>Zebrasoma</i>      |                  |
| 5   | NC_009851 | <i>Luvarus imperialis</i>            |                  | Luvaridae         | <i>Luvarus</i>        |                  |
| 6   | NC_009852 | <i>Zanclus cornutus</i>              |                  | Zanclidae         | <i>Zanclus</i>        |                  |
| 7   | NC_015984 | <i>Lepomis macrochirus</i>           | Centrarchiformes | Centrarchidae     | <i>Lepomis</i>        |                  |
| 8   | NC_008106 | <i>Micropterus salmoides</i>         |                  |                   | <i>Micropterus</i>    |                  |
| 9   | NC_028298 | <i>Pomoxis nigromaculatus</i>        |                  |                   | <i>Pomoxis</i>        |                  |
| 10  | NC_024858 | <i>Cheilodactylus zonatus</i>        |                  | Cheilodactylidae  | <i>Cheilodactylus</i> |                  |
| 11  | NC_013181 | <i>Enoplosus armatus</i>             |                  | Enoplosidae       | <i>Enoplosus</i>      |                  |
| 12  | NC_013142 | <i>Kuhlia mugil</i>                  |                  | Kuhliidae         | <i>Kuhlia</i>         |                  |
| 13  | NC_013137 | <i>Girella punctata</i>              |                  | Kyphosidae        | <i>Girella</i>        |                  |
| 14  | NC_013138 | <i>Kyphosus cinerascens</i>          |                  |                   | <i>Kyphosus</i>       |                  |
| 15  | NC_013139 | <i>Labracoglossa argenteiventris</i> |                  |                   | <i>Labracoglossa</i>  |                  |
| 16  | NC_013182 | <i>Microcanthus strigatus</i>        |                  |                   | <i>Microcanthus</i>   |                  |
| 17  | NC_013140 | <i>Scorpius lineolata</i>            |                  |                   | <i>Scorpius</i>       |                  |
| 18  | NC_024853 | <i>Tilodon sexfasciatum</i>          |                  |                   | <i>Tilodon</i>        |                  |
| 19  | NC_010968 | <i>Oplegnathus fasciatus</i>         |                  | Oplegnathidae     | <i>Oplegnathus</i>    |                  |
| 20  | NC_024850 | <i>Percalates novemaculeata</i>      |                  | Percalatidae      | <i>Percalates</i>     |                  |
| 21  | NC_024847 | <i>Bostockia porosa</i>              |                  | Percichthyidae    | <i>Bostockia</i>      |                  |
| 22  | NC_024436 | <i>Gadopsis marmoratus</i>           |                  |                   | <i>Gadopsis</i>       |                  |
| 23  | NC_023807 | <i>Maccullochella peelii</i>         |                  |                   | <i>Maccullochella</i> |                  |
| 24  | NC_023383 | <i>Macquaria australasica</i>        |                  |                   | <i>Macquaria</i>      |                  |
| 25  | NC_015542 | <i>Nannoperca australis</i>          |                  |                   | <i>Nannoperca</i>     |                  |
| 26  | NC_024846 | <i>Percilia irwini</i>               |                  |                   | <i>Percilia</i>       |                  |
| 27  | NC_009868 | <i>Coreoperca kawamebari</i>         |                  | Sinipercaidae     | <i>Coreoperca</i>     |                  |
| 28  | NC_015815 | <i>Siniperca scherzeri</i>           |                  |                   | <i>Siniperca</i>      |                  |
| 29  | NC_024854 | <i>Bidyanus bidyanus</i>             |                  | Terapontidae      | <i>Bidyanus</i>       |                  |
| 30  | NC_013141 | <i>Rhynchopelates oxyrhynchus</i>    |                  |                   | <i>Rhynchopelates</i> |                  |
| 31  | NC_027171 | <i>Scortum barcoo</i>                |                  |                   | <i>Scortum</i>        |                  |
| 32  | NC_027281 | <i>Terapon jarbua</i>                |                  |                   | <i>Terapon</i>        |                  |
| 33  | NC_009870 | <i>Chaetodon auripes</i>             |                  | Chaetodontiformes | Chaetodontidae        | <i>Chaetodon</i> |
| 34  | NC_025953 | <i>Chelmon rostratus</i>             |                  |                   |                       | <i>Chelmon</i>   |
| 35  | NC_009871 | <i>Heniochus diphreutes</i>          |                  |                   |                       | <i>Heniochus</i> |
| 36  | NC_027733 | <i>Ephippus orbis</i>                |                  | Ehippiformes      | Ehippidae             | <i>Ephippus</i>  |
| 37  | NC_013136 | <i>Platax orbicularis</i>            | <i>Platax</i>    |                   |                       |                  |
| 38  | KM257863  | <i>Argyrosomus amoyensis</i>         | Eupercaria       | Sciaenidae        | <i>Argyrosomus</i>    |                  |
| 39  | NC_017610 | <i>Argyrosomus japonicus</i>         |                  |                   |                       |                  |

|    |           |                                     |               |                    |                         |                  |
|----|-----------|-------------------------------------|---------------|--------------------|-------------------------|------------------|
| 40 | NC_018347 | <i>Bahaba taipingensis</i>          |               |                    | <i>Bahaba</i>           |                  |
| 41 | NC_016987 | <i>Chrysochir aureus</i>            |               |                    | <i>Chrysochir</i>       |                  |
| 42 | NC_014263 | <i>Collichthys niveatus</i>         |               |                    | <i>Collichthys</i>      |                  |
| 43 | NC_017606 | <i>Dendrophysa russelii</i>         |               |                    | <i>Dendrophysa</i>      |                  |
| 44 | NC_021130 | <i>Johnius grypotus</i>             |               |                    | <i>Johnius</i>          |                  |
| 45 | NC_011710 | <i>Larimichthys crocea</i>          |               |                    | <i>Larimichthys</i>     |                  |
| 46 | NC_014351 | <i>Miichthys miuy</i>               |               |                    | <i>Miichthys</i>        |                  |
| 47 | KM233452  | <i>Nibea coibor</i>                 |               |                    | <i>Nibea</i>            |                  |
| 48 | NC_015205 | <i>Nibea albiflora</i>              |               |                    | <i>Nibea</i>            |                  |
| 49 | NC_015202 | <i>Pennahia argentata</i>           |               |                    | <i>Pennahia</i>         |                  |
| 50 | KM257722  | <i>Protonibea diacanthus</i>        |               |                    | <i>Protonibea</i>       |                  |
| 51 | NC_016867 | <i>Sciaenops ocellatus</i>          |               |                    | <i>Sciaenops</i>        |                  |
| 52 | NC_028423 | <i>Bodianus oxycephalus</i>         | Labriformes   | Labridae           | <i>Bodianus</i>         |                  |
| 53 | NC_013842 | <i>Cheilinus undulatus</i>          |               |                    | <i>Cheilinus</i>        |                  |
| 54 | NC_006355 | <i>Chlorurus sordidus</i>           |               |                    | <i>Chlorurus</i>        |                  |
| 55 | NC_025771 | <i>Choerodon schoenleinii</i>       |               |                    | <i>Choerodon</i>        |                  |
| 56 | NC_009066 | <i>Halichoeres melanurus</i>        |               |                    | <i>Halichoeres</i>      |                  |
| 57 | NC_028289 | <i>Macropharyngodon negrosensis</i> |               |                    | <i>Macropharyngodon</i> |                  |
| 58 | NC_009459 | <i>Parajulis poecilepterus</i>      |               |                    | <i>Parajulis</i>        |                  |
| 59 | NC_009067 | <i>Pseudolabrus sieboldi</i>        |               |                    | <i>Pseudolabrus</i>     |                  |
| 60 | NC_010205 | <i>Pteragogus flagellifer</i>       |               |                    | <i>Pteragogus</i>       |                  |
| 61 | NC_011343 | <i>Scarus rubroviolaceus</i>        |               |                    | <i>Scarus</i>           |                  |
| 62 | NC_009061 | <i>Olisthops cyanomelas</i>         |               |                    | Odacidae                | <i>Olisthops</i> |
| 63 | NC_030259 | <i>Datnioides undecimradiatus</i>   |               |                    | Lobotiformes            | Datnioididae     |
| 64 | NC_026233 | <i>Lobotes surinamensis</i>         | Lobotidae     | <i>Lobotes</i>     |                         |                  |
| 65 | NC_004383 | <i>Caulophryne jordani</i>          | Lophiiformes  | Caulophrynidae     | <i>Caulophryne</i>      |                  |
| 66 | NC_013882 | <i>Ceratias uranoscopus</i>         |               | Ceratiidae         | <i>Ceratias</i>         |                  |
| 67 | NC_013880 | <i>Cryptopsaras couesii</i>         |               |                    | <i>Cryptopsaras</i>     |                  |
| 68 | NC_004381 | <i>Chaunax abei</i>                 |               | Chaunacidae        | <i>Chaunax</i>          |                  |
| 69 | NC_013869 | <i>Bufoceratias thele</i>           |               | Diceratiidae       | <i>Bufoceratias</i>     |                  |
| 70 | NC_013870 | <i>Diceratias pileatus</i>          |               |                    | <i>Diceratias</i>       |                  |
| 71 | NC_013885 | <i>Gigantactis vanhoeffeni</i>      |               | Gigantactinidae    | <i>Gigantactis</i>      |                  |
| 72 | NC_013863 | <i>Rhynchactis macrothrix</i>       |               |                    | <i>Rhynchactis</i>      |                  |
| 73 | NC_013867 | <i>Himantolophus albinareis</i>     |               | Himantolophidae    | <i>Himantolophus</i>    |                  |
| 74 | NC_013865 | <i>Haplophryne mollis</i>           |               | Linophrynidae      | <i>Haplophryne</i>      |                  |
| 75 | NC_013872 | <i>Lophiodes caularis</i>           |               | Lophiidae          | <i>Lophiodes</i>        |                  |
| 76 | NC_008125 | <i>Lophiomus setigerus</i>          |               |                    | <i>Lophiomus</i>        |                  |
| 77 | NC_004380 | <i>Lophius americanus</i>           |               |                    | <i>Lophius</i>          |                  |
| 78 | NC_013873 | <i>Sladenia gardineri</i>           |               |                    | <i>Sladenia</i>         |                  |
| 79 | NC_004384 | <i>Melanocetus murrayi</i>          | Melanocetidae | <i>Melanocetus</i> |                         |                  |
| 80 | NC_013864 | <i>Neoceratias spinifer</i>         | Neoceratiidae | <i>Neoceratias</i> |                         |                  |

|     |           |                                     |                 |                   |                         |                   |
|-----|-----------|-------------------------------------|-----------------|-------------------|-------------------------|-------------------|
| 81  | NC_013886 | <i>Coelophrys brevicaudata</i>      |                 | Ogocephalidae     | <i>Coelophrys</i>       |                   |
| 82  | NC_013871 | <i>Oneirodes thompsoni</i>          |                 | Oneirodidae       | <i>Oneirodes</i>        |                   |
| 83  | NC_013875 | <i>Thaumatichthys pagidostomus</i>  |                 | Thaumatichthyidae | <i>Thaumatichthys</i>   |                   |
| 84  | NC_009867 | <i>Doederleinia berycoides</i>      | Pempheriformes  | Acropomatidae     | <i>Doederleinia</i>     |                   |
| 85  | NC_028165 | <i>Banjos banjos</i>                |                 | Banjosidae        | <i>Banjos</i>           |                   |
| 86  | NC_024852 | <i>Howella brodiei</i>              |                 | Howellidae        | <i>Howella</i>          |                   |
| 87  | NC_018045 | <i>Lateolabrax maculatus</i>        |                 | Lateolabracidae   | <i>Lateolabrax</i>      |                   |
| 88  | NC_015786 | <i>Histiopterus typus</i>           |                 | Pentacerotidae    | <i>Histiopterus</i>     |                   |
| 89  | NC_021758 | <i>Pentaceros japonicus</i>         |                 |                   | <i>Pentaceros</i>       |                   |
| 90  | NC_020016 | <i>Pseudopentaceros richardsoni</i> |                 |                   | <i>Pseudopentaceros</i> |                   |
| 91  | NC_027600 | <i>Ulcina olrikii</i>               |                 | Perciformes       | Agonidae                | <i>Ulcina</i>     |
| 92  | NC_009773 | <i>Anarhichas lupus</i>             |                 |                   | Anarhichadidae          | <i>Anarhichas</i> |
| 93  | NC_018119 | <i>Anoplopoma fimbria</i>           | Anoplopomatidae |                   | <i>Anoplopoma</i>       |                   |
| 94  | NC_026889 | <i>Erilepis zonifer</i>             |                 |                   | <i>Erilepis</i>         |                   |
| 95  | NC_011569 | <i>Aulichthys japonicus</i>         | Aulorhynchidae  |                   | <i>Aulichthys</i>       |                   |
| 96  | NC_010268 | <i>Aulorhynchus flavidus</i>        |                 |                   | <i>Aulorhynchus</i>     |                   |
| 97  | NC_026578 | <i>Parachaenichthys charcoti</i>    | Bathdraconidae  |                   | <i>Parachaenichthys</i> |                   |
| 98  | NC_015654 | <i>Chaenocephalus aceratus</i>      | Channichthyidae |                   | <i>Chaenocephalus</i>   |                   |
| 99  | NC_018340 | <i>Champsocephalus gunnari</i>      |                 |                   | <i>Champsocephalus</i>  |                   |
| 100 | NC_029737 | <i>Chionodraco hamatus</i>          |                 |                   | <i>Chionodraco</i>      |                   |
| 101 | NC_013828 | <i>Clinocottus analis</i>           | Cottidae        |                   | <i>Clinocottus</i>      |                   |
| 102 | NC_004404 | <i>Cottus reinii</i>                |                 |                   | <i>Cottus</i>           |                   |
| 103 | NC_022147 | <i>Enophrys diceraus</i>            |                 |                   | <i>Enophrys</i>         |                   |
| 104 | NC_027587 | <i>Icelus spatula</i>               |                 |                   | <i>Icelus</i>           |                   |
| 105 | NC_022181 | <i>Mesocottus haitej</i>            |                 |                   | <i>Mesocottus</i>       |                   |
| 106 | NC_018770 | <i>Trachidermus fasciatus</i>       |                 |                   | <i>Trachidermus</i>     |                   |
| 107 | NC_008129 | <i>Aptocyclus ventricosus</i>       | Cyclopteridae   |                   | <i>Aptocyclus</i>       |                   |
| 108 | NC_011580 | <i>Apeltes quadracus</i>            | Gasterosteidae  |                   | <i>Apeltes</i>          |                   |
| 109 | NC_011577 | <i>Culaea inconstans</i>            |                 |                   | <i>Culaea</i>           |                   |
| 110 | NC_011570 | <i>Gasterosteus wheatlandi</i>      |                 |                   | <i>Gasterosteus</i>     |                   |
| 111 | NC_011571 | <i>Pungitius pungitius</i>          |                 |                   | <i>Pungitius</i>        |                   |
| 112 | NC_011582 | <i>Spinachia spinachia</i>          |                 |                   | <i>Spinachia</i>        |                   |
| 113 | NC_021459 | <i>Hexagrammos agrammus</i>         | Hexagrammidae   |                   | <i>Hexagrammos</i>      |                   |
| 114 | NC_026887 | <i>Ophiodon elongatus</i>           |                 |                   | <i>Ophiodon</i>         |                   |
| 115 | NC_023129 | <i>Pleurogrammus azonus</i>         |                 |                   | <i>Pleurogrammus</i>    |                   |
| 116 | NC_004400 | <i>Hypoptychus dybowskii</i>        | Hypoptychidae   |                   | <i>Hypoptychus</i>      |                   |
| 117 | NC_018135 | <i>Dissostichus eleginoides</i>     | Nototheniidae   |                   | <i>Dissostichus</i>     |                   |
| 118 | NC_015653 | <i>Notothenia coriiceps</i>         |                 |                   | <i>Notothenia</i>       |                   |
| 119 | NC_030320 | <i>Pagothenia borchgrevinki</i>     |                 |                   | <i>Pagothenia</i>       |                   |
| 120 | NC_015652 | <i>Pleuragramma antarctica</i>      |                 |                   | <i>Pleuragramma</i>     |                   |
| 121 | NC_005254 | <i>Etheostoma radiosum</i>          | Percidae        |                   | <i>Etheostoma</i>       |                   |
| 122 | NC_025785 | <i>Gymnocephalus cernua</i>         |                 |                   | <i>Gymnocephalus</i>    |                   |

|     |           |                                    |                   |                 |                      |
|-----|-----------|------------------------------------|-------------------|-----------------|----------------------|
| 123 | NC_019572 | <i>Perca flavescens</i>            |                   |                 | <i>Perca</i>         |
| 124 | NC_008111 | <i>Percina macrolepida</i>         |                   |                 | <i>Percina</i>       |
| 125 | NC_021444 | <i>Sander canadensis</i>           |                   |                 | <i>Sander</i>        |
| 126 | NC_004403 | <i>Scalicus amiscus</i>            |                   | Peristediidae   | <i>Scalicus</i>      |
| 127 | NC_004410 | <i>Pholis crassispina</i>          |                   | Pholidae        | <i>Pholis</i>        |
| 128 | NC_022481 | <i>Platycephalus indicus</i>       |                   | Platycephalidae | <i>Platycephalus</i> |
| 129 | NC_024746 | <i>Pterois miles</i>               |                   | Scorpaenidae    | <i>Pterois</i>       |
| 130 | NC_027735 | <i>Scorpaenopsis cirrosa</i>       |                   |                 | <i>Scorpaenopsis</i> |
| 131 | NC_003195 | <i>Helicolenus hilgendorfi</i>     |                   | Sebastidae      | <i>Helicolenus</i>   |
| 132 | NC_005450 | <i>Sebastes schlegelii</i>         |                   |                 | <i>Sebastes</i>      |
| 133 | NC_013812 | <i>Sebastiscus marmoratus</i>      |                   |                 | <i>Sebastiscus</i>   |
| 134 | NC_022141 | <i>Aethaloperca rogae</i>          |                   | Serranidae      | <i>Aethaloperca</i>  |
| 135 | NC_012709 | <i>Anyperodon leucogrammicus</i>   |                   |                 | <i>Anyperodon</i>    |
| 136 | NC_021134 | <i>Cephalopholis boenak</i>        |                   |                 | <i>Cephalopholis</i> |
| 137 | NC_021614 | <i>Cromileptes altivelis</i>       |                   |                 | <i>Cromileptes</i>   |
| 138 | NC_026897 | <i>Diploprion bifasciatum</i>      |                   |                 | <i>Diploprion</i>    |
| 139 | NC_011111 | <i>Epinephelus coioides</i>        |                   |                 | <i>Epinephelus</i>   |
| 140 | NC_024108 | <i>Grammistes sexlineatus</i>      |                   |                 | <i>Grammistes</i>    |
| 141 | NC_013832 | <i>Hypoplectrus gemma</i>          |                   |                 | <i>Hypoplectrus</i>  |
| 142 | NC_013829 | <i>Hyporthodus septemfasciatus</i> |                   |                 | <i>Hyporthodus</i>   |
| 143 | NC_008449 | <i>Plectropomus leopardus</i>      |                   |                 | <i>Plectropomus</i>  |
| 144 | NC_028286 | <i>Pseudanthias dispar</i>         |                   |                 | <i>Pseudanthias</i>  |
| 145 | NC_022140 | <i>Triso dermatopterus</i>         |                   |                 | <i>Triso</i>         |
| 146 | NC_022138 | <i>Variola louti</i>               |                   | <i>Variola</i>  |                      |
| 147 | NC_028022 | <i>Chirolophis japonicus</i>       |                   | Stichaeidae     | <i>Chirolophis</i>   |
| 148 | NC_027588 | <i>Leptoclinus maculatus</i>       |                   |                 | <i>Leptoclinus</i>   |
| 149 | NC_026989 | <i>Synanceia verrucosa</i>         |                   | Synanceiidae    | <i>Synanceia</i>     |
| 150 | NC_002812 | <i>Arctoscopus japonicus</i>       |                   | Trichodontidae  | <i>Arctoscopus</i>   |
| 151 | NC_004409 | <i>Lycodes toyamensis</i>          |                   | Zoarcidae       | <i>Lycodes</i>       |
| 152 | NC_009854 | <i>Spicara maena</i>               | Spariformes       | Centracanthidae | <i>Spicara</i>       |
| 153 | NC_009855 | <i>Lethrinus obsoletus</i>         |                   | Lethrinidae     | <i>Lethrinus</i>     |
| 154 | NC_010957 | <i>Monotaxis grandoculis</i>       |                   |                 | <i>Monotaxis</i>     |
| 155 | NC_010977 | <i>Acanthopagrus latus</i>         |                   | Sparidae        | <i>Acanthopagrus</i> |
| 156 | NC_029479 | <i>Dentex tumifrons</i>            |                   |                 | <i>Dentex</i>        |
| 157 | NC_009502 | <i>Pagellus bogaraveo</i>          |                   |                 | <i>Pagellus</i>      |
| 158 | NC_003196 | <i>Pagrus major</i>                |                   |                 | <i>Pagrus</i>        |
| 159 | NC_008616 | <i>Parargyrops edita</i>           |                   |                 | <i>Parargyrops</i>   |
| 160 | NC_025301 | <i>Rhabdosargus sarba</i>          |                   |                 | <i>Rhabdosargus</i>  |
| 161 | NC_024236 | <i>Sparus aurata</i>               |                   | <i>Sparus</i>   |                      |
| 162 | NC_011319 | <i>Anoplocapros lenticularis</i>   | Tetraodontiformes | Aracanidae      | <i>Anoplocapros</i>  |
| 163 | NC_009864 | <i>Kentrocapros aculeatus</i>      |                   |                 | <i>Kentrocapros</i>  |
| 164 | NC_011943 | <i>Abalistes stellaris</i>         |                   | Balistidae      | <i>Abalistes</i>     |

|     |           |                                       |               |              |                          |
|-----|-----------|---------------------------------------|---------------|--------------|--------------------------|
| 165 | NC_011946 | <i>Balistapus undulatus</i>           |               |              | <i>Balistapus</i>        |
| 166 | NC_011948 | <i>Balistes vetula</i>                |               |              | <i>Balistes</i>          |
| 167 | NC_011934 | <i>Balistoides conspicillum</i>       |               |              | <i>Balistoides</i>       |
| 168 | NC_011935 | <i>Canthidermis maculata</i>          |               |              | <i>Canthidermis</i>      |
| 169 | NC_011937 | <i>Melichthys vidua</i>               |               |              | <i>Melichthys</i>        |
| 170 | NC_011938 | <i>Odonus niger</i>                   |               |              | <i>Odonus</i>            |
| 171 | NC_011939 | <i>Pseudobalistes flavimarginatus</i> |               |              | <i>Pseudobalistes</i>    |
| 172 | NC_011941 | <i>Rhinecanthus aculeatus</i>         |               |              | <i>Rhinecanthus</i>      |
| 173 | NC_004416 | <i>Sufflamen fraenatum</i>            |               |              | <i>Sufflamen</i>         |
| 174 | NC_011945 | <i>Xanthichthys auromarginatus</i>    |               |              | <i>Xanthichthys</i>      |
| 175 | NC_011321 | <i>Xenobalistes tumidipectoris</i>    |               |              | <i>Xenobalistes</i>      |
| 176 | NC_005837 | <i>Masturus lanceolatus</i>           |               |              | <i>Masturus</i>          |
| 177 | NC_005836 | <i>Mola mola</i>                      |               | Molidae      | <i>Mola</i>              |
| 178 | NC_007887 | <i>Ranzania laevis</i>                |               |              | <i>Ranzania</i>          |
| 179 | NC_011947 | <i>Acanthaluteres brownii</i>         |               |              | <i>Acanthaluteres</i>    |
| 180 | NC_011950 | <i>Acreichthys tomentosus</i>         |               |              | <i>Acreichthys</i>       |
| 181 | NC_011323 | <i>Aluterus scriptus</i>              |               |              | <i>Aluterus</i>          |
| 182 | NC_011952 | <i>Amanses scopas</i>                 |               |              | <i>Amanses</i>           |
| 183 | NC_011940 | <i>Brachaluteres ulvarum</i>          |               |              | <i>Brachaluteres</i>     |
| 184 | NC_011325 | <i>Cantherhines pardalis</i>          |               |              | <i>Cantherhines</i>      |
| 185 | NC_011951 | <i>Chaetodermis penicilligerus</i>    |               |              | <i>Chaetodermis</i>      |
| 186 | NC_011953 | <i>Eubalichthys mosaicus</i>          |               |              | <i>Eubalichthys</i>      |
| 187 | NC_011956 | <i>Meuschenia hippocrepis</i>         |               |              | <i>Meuschenia</i>        |
| 188 | NC_011925 | <i>Monacanthus chinensis</i>          |               |              | <i>Monacanthus</i>       |
| 189 | NC_011921 | <i>Nelusetta ayraudi</i>              |               |              | <i>Nelusetta</i>         |
| 190 | NC_011927 | <i>Oxymonacanthus longirostris</i>    |               |              | <i>Oxymonacanthus</i>    |
| 191 | NC_011929 | <i>Paraluteres prionurus</i>          |               |              | <i>Paraluteres</i>       |
| 192 | NC_011931 | <i>Paramonacanthus choirocephalus</i> |               |              | <i>Paramonacanthus</i>   |
| 193 | NC_011932 | <i>Pervagor janthinosoma</i>          |               |              | <i>Pervagor</i>          |
| 194 | NC_011955 | <i>Pseudalutarius nasicornis</i>      |               |              | <i>Pseudalutarius</i>    |
| 195 | NC_011933 | <i>Pseudomonacanthus peroni</i>       |               |              | <i>Pseudomonacanthus</i> |
| 196 | NC_011924 | <i>Rudarius ercodes</i>               |               |              | <i>Rudarius</i>          |
| 197 | NC_011926 | <i>Scobinichthys granulatus</i>       |               |              | <i>Scobinichthys</i>     |
| 198 | NC_003177 | <i>Stephanolepis cirrhifer</i>        |               |              | <i>Stephanolepis</i>     |
| 199 | NC_011327 | <i>Thamnaconus modestus</i>           |               |              | <i>Thamnaconus</i>       |
| 200 | NC_011330 | <i>Lactoria diaphana</i>              |               |              | <i>Lactoria</i>          |
| 201 | NC_009865 | <i>Ostracion immaculatus</i>          |               | Ostraciidae  | <i>Ostracion</i>         |
| 202 | NC_009859 | <i>Triodon macropterus</i>            |               | Triodontidae | <i>Triodon</i>           |
| 203 | NC_018037 | <i>Cyprinus carpio haematopterus</i>  | Cypriniformes | Cyprinidae   | <i>Cyprinus</i>          |
| 204 | NC_002333 | <i>Danio rerio</i>                    |               |              | <i>Danio</i>             |



Note: The lineages of the species No. 1-202 are Eukaryota, Metazoa, Chordata, Craniata, Vertebrata, Euteleostomi, Actinopterygii, Neopterygii, Teleostei, Neoteleostei, Acanthomorphata and Eupercaria. And the lineages of the species No. 203-204 are Eukaryota, Metazoa, Chordata, Craniata, Vertebrata, Euteleostomi, Actinopterygii, Neopterygii, Teleostei and Ostariophysi.
